# Supplementary material
Source: PubMed Central journal article supplement (PMC5104172)
Supplement: NIHMS827392-supplement-Supplement.pdf [file NIHMS827392-supplement-Supplement.pdf]

## 569 Supplementary Figure Legend

Supplementary Figure 1: **Robustness results** We tested the robustness of our analysis by adding variation to the sizes of the individual demes in a 1D-expansion. Deme sizes were drawn from Gamma distributions with mean 1 and variances 0.001, 0.1 and 1, respectively (top to bottom row). Each set of points corresponds to  $\psi$  estimated from simulations under a specific  $k_e$  value,  $k_e$  varies from 100 to 500 in increments of 100 (top to bottom/ blue to green). Grey dashed lines give the expectation from the branching process model assuming a constant population size.

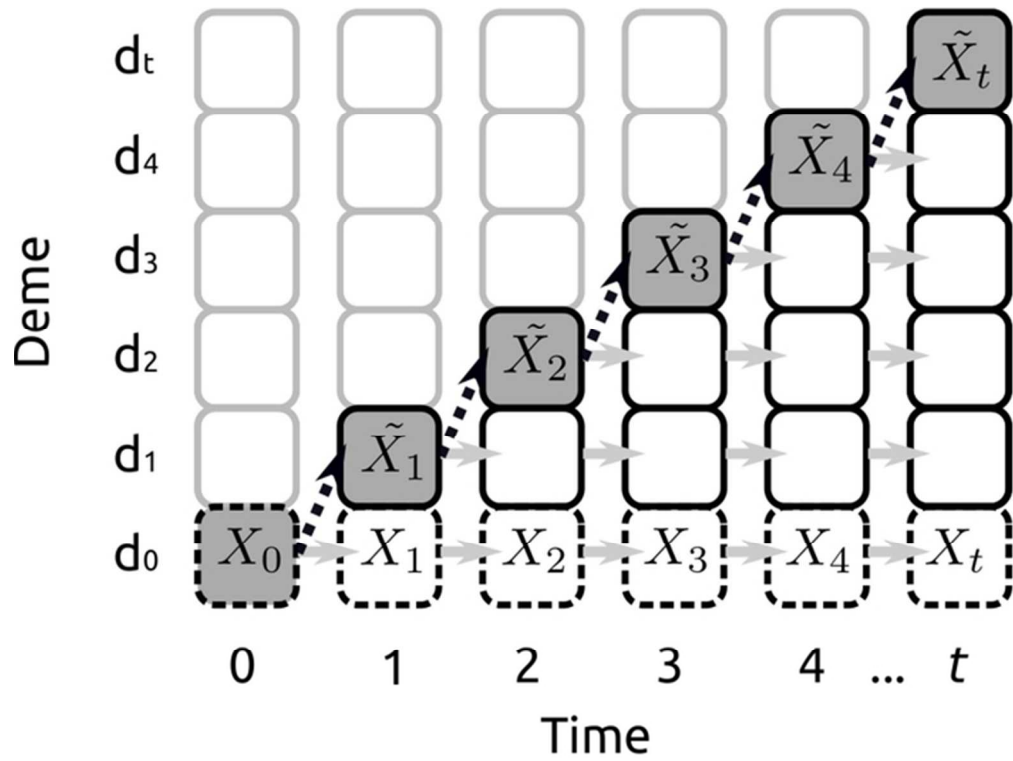

59x44mm (300 x 300 DPI)
